# Supplementary material for: Circadian Syndrome as a Stronger Predictor of Asthma Than Metabolic Syndrome: Evidence from NHANES 2005–2018
Source: Research Square preprint supplement (doi:10.21203/rs.3.rs-8599285/v1), 2026-02-17
Supplement: Supplementary file 1 [file 3255b6247bb1f257916eff59.docx]

**Supplement Table 1** Positive predictive value (PPV) (95%CI), negative predictive value (NPV) for metabolic syndrome and circadian syndrome in predicting prevalent and current asthma among adults attending the US National Health and Nutrition Survey (NHANES 2005-2018, N=13,976)

|  |  | Men |  |  |  | Women |  |
| --- | --- | --- | --- | --- | --- | --- | --- |
|  | PPV (%) | NPV (%) |  |  | PPV (%) | NPV (%) |  |
| Lifetime asthma |  |  |  |  |  |  |  |
| MetS | 11.9(10.9-13.1) | 87.0(85.8-88.0) |  |  | 18.6(17.3-20.0) | 86.1(84.9-87.2) |  |
| CircS | 13.4(12.2-14.7) | 88.1(87.1-89.1) |  |  | 19.7(18.3-21.2) | 86.4(85.3-87.4) |  |
| Current asthma |  |  |  |  |  |  |  |
| MetS | 6.7 (5.9-7.6) | 94.6 (93.8-95.3) |  |  | 13.2(12.1-14.4) | 91.8(90.9-92.7) |  |
| CircS | 7.8 (6.8-8.8) | 95.1 (94.4-95.8) |  |  | 13.8(12.6-15.1) | 91.7(90.8-92.5) |  |

Abbreviations: CircS, circadian syndrome; MetS, metabolic syndrome.
